# Supplementary material
Source: Springer Nature journal article supplement (https://www.springermedizin.de/resource/supplementary/12889_2014_7399_MOESM4_ESM.pdf/9497330)

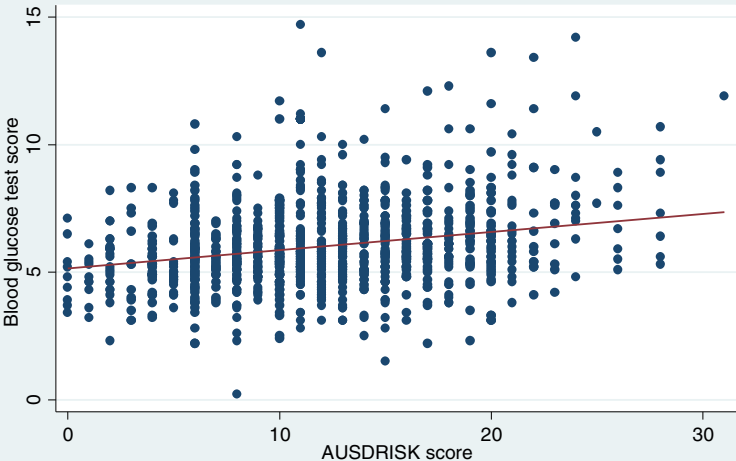

● Blood glucose test score — Fitted values

Supplement: MOESM4 [file 9497330]
